# Supplementary material for: Bridging the Research to Practice Gap: A Systematic Scoping Review of Implementation of Interventions for Cancer-Related Fatigue Management
Source: Research Square preprint supplement (doi:10.21203/rs.3.rs-136860/v1), 2020-12-31
Supplement: Supplementary file 1 [file 3ac9e90cb0fc2a8c627a7a19.docx]

**Additional File 5:** Reporting of RE-AIM Indicators Across all Included Studies

|  | **REACH** | | | | | | | | | | **EFFECTIVENESS** | | | | | | | **ADOPTION** | | | | | | | | | | | | **IMPLEMENTATION** | | | | | | | | **MAINTENANCE** | | | | | | |
| --- | --- | --- | --- | --- | --- | --- | --- | --- | --- | --- | --- | --- | --- | --- | --- | --- | --- | --- | --- | --- | --- | --- | --- | --- | --- | --- | --- | --- | --- | --- | --- | --- | --- | --- | --- | --- | --- | --- | --- | --- | --- | --- | --- | --- |
|  | R1 | R2 | R3 | R4 | R5 | R6 | R7 | R8 | R9 | R10 | E1 | E2 | E3 | E4 | E5 | E6 | E7 | A1 | A2 | A3 | A4 | A5 | A6 | A7 | A8 | A9 | A10 | A11 | A12 | I1 | I2 | I3 | I4 | I5 | I6 | I7 | I8 | M1 | M2 | M3 | M4 | M5 | M6 | M7 |
| Abbott et al. 2017 & Huether et al., 2016 | + | - | + | + | + | - | - | + | - | - | + | - | - | + | + | - | + | + | - | - | + | - | - | - | - | + | + | - | - | + | + | + | + | - | + | + | + | - | - | + | - | Y | - | - |
| Borneman et al., 2010 & 2011 | + | - | - | + | - | - | -,+ | + | -,+ | - | + | - | + | + | - | - | +,- | - | - | - | + | - | + | - | - | + | + | - | - | - | + | **+** | + | - | - | - | - | - | - | + | - | - | - | - |
| Jones et al., 2020 | + | - | - | + | - | - | - | + | + | - | - | - | - | - | - | - | - | - | - | - | - | - | - | - | - | + | + | - | - | + | + | + | + | - | - | + | - | - | - | - | - | - | - | - |
| Tian et. al 2017 | + | - | - | + | - | - | - | + | - | - | + | - | - | - | - | - | - | - | - | - | + | - | + | - | - | - | - | - | - | + | - | - | - | - | - | - | - | - | - | + | - | - | - | - |
| Van Gerpen & Becker, 2013 | + | - | + | + | - | - | - | + | - | - | + | - | - | + | + | - | - | - | - | - | - | - | + | - | - | + | + | - | - | - | + | + | + | - | - | + | - | - | - | + | - | Y | + | - |
| Wang et al., 2018 | - | - | - | - | - | - | - | - | - | - | - | - | - | - | - | - | - | - | - | - | + | - | - | - | - | - | - | - | - | - | + | - | - | - | - | + | - | - | - | - | - | - | - | - |

(N.A) Not Applicable, (+) reported, (-) not-reported, (Y) yes, (N) no.
